# Supplementary material for: Nrf2/HO-1 mediates the neuroprotective effects of pramipexole by attenuating oxidative damage and mitochondrial perturbation after traumatic brain injury in rats
Source: PubMed Central journal article supplement (PMC7449795; doi:10.1242/dmm.045021), 2020-08-19
Supplement: dmm-13-045021-s1.pdf [file dmm-13-045021-s1.pdf]

**Table S1. Number of animals used in each group.**

| Experiments                            | Experimental Groups                |                         |                                 |                                |
|----------------------------------------|------------------------------------|-------------------------|---------------------------------|--------------------------------|
|                                        | Sham (Control)<br>(No. of Animals) | TBI<br>(No. of Animals) | TBI+0.25PPX<br>(No. of Animals) | TBI+1.0PPX<br>(No. of Animals) |
| Behavioral                             | 8                                  | 8                       | 8                               | 8                              |
| Biochemical<br>Analysis                |                                    |                         |                                 |                                |
| Western Blot                           | 4                                  | 4                       | 4                               | 4                              |
| Mitochondrial<br>membrane<br>potential | 8                                  | 8                       | 8                               | 8                              |
| ROS                                    |                                    |                         |                                 |                                |
| ATP                                    |                                    |                         |                                 |                                |
| Nissl Stain                            | 3                                  | 3                       | 3                               | 3                              |
